# Supplementary material for: A calcium hydroxide/oleic acid/phospholipid nanoparticle induced cancer cell apoptosis by the combination of intracellular calcium overload and lactic acidosis elimination
Source: Royal Society of Chemistry journal article supplement (doi:10.1039/d3tb00227f), 2023-01-01
Supplement: d3tb00227f1.pdf [file d3tb00227f1.pdf]

### Supplementary Information

#### A calcium hydroxide/oleic acid/phospholipid nanoparticle induced cancer cell apoptosis by the combination of intracellular calcium overload and lactic acidosis elimination

Fei Zhou<sup>a,1</sup>, Yang Yang<sup>a,1</sup>, Yuying Liu<sup>a</sup>, Haotian Deng<sup>a</sup>, Jianhua Rong<sup>a,b</sup>, Jianhao Zhao<sup>a,b,\*</sup>

<sup>a</sup> Department of Materials Science and Engineering, College of Chemistry and Materials Science, Jinan University, Guangzhou 511436, China

<sup>b</sup> Engineering Research Center of Artificial Organs and Materials, Ministry of Education, Guangzhou 511436, China

\*Corresponding author at: Department of Materials Science and Engineering, College of Chemistry and Materials Science, Jinan University, Guangzhou 511436, China.

Correspondence to: Jianhao Zhao (E-mail: [jhzhao@jnu.edu.cn](mailto:jhzhao@jnu.edu.cn))

Tel./fax: +86 20 37331541

<sup>1</sup> These authors contributed equally to this work.

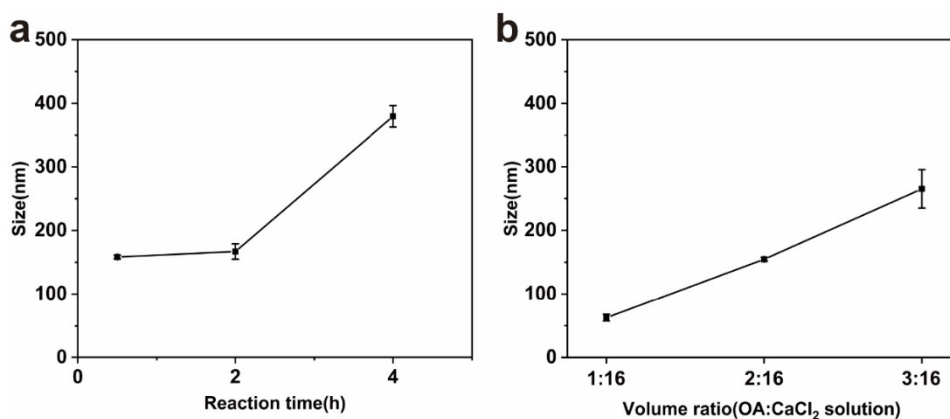

S1 Effect of (a) reaction time and (b) volume ratio of OA and CaCl<sub>2</sub> solution on the particle size of Ca(OH)<sub>2</sub>-OA NPs.

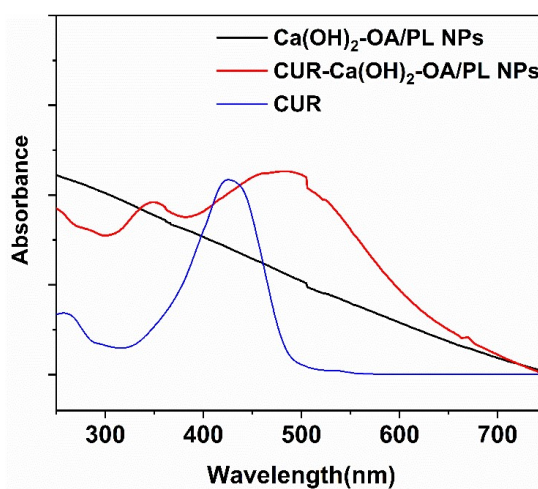

S2 UV-vis spectra of CUR, Ca(OH)<sub>2</sub>-OA/PL NPs, and CUR-Ca(OH)<sub>2</sub>-OA/PL NPs at a wavelength range of 250~750 nm.
